# Supplementary material
Source: PubMed Central journal article supplement (PMC8126789)
Supplement: pnas.2020490118.sapp.pdf [file pnas.2020490118.sapp.pdf]

Supplementary Information for

**Hypoxia-inducible factor-dependent ADAM12 expression mediates breast cancer invasion and metastasis**

Ru Wang, Ines Godet, Yongkang Yang, Shaima Salman, Haiquan Lu, Yajing Lyu, Yufeng Wang, Yayun Zhu, Chelsey Chen, Jianjun He, Daniele M. Gilkes, and Gregg L. Semenza

Email: [gsemenza@jhmi.edu](mailto:gsemenza@jhmi.edu)

**This PDF includes:**

Figures S1 to S4

Tables S1 to S5

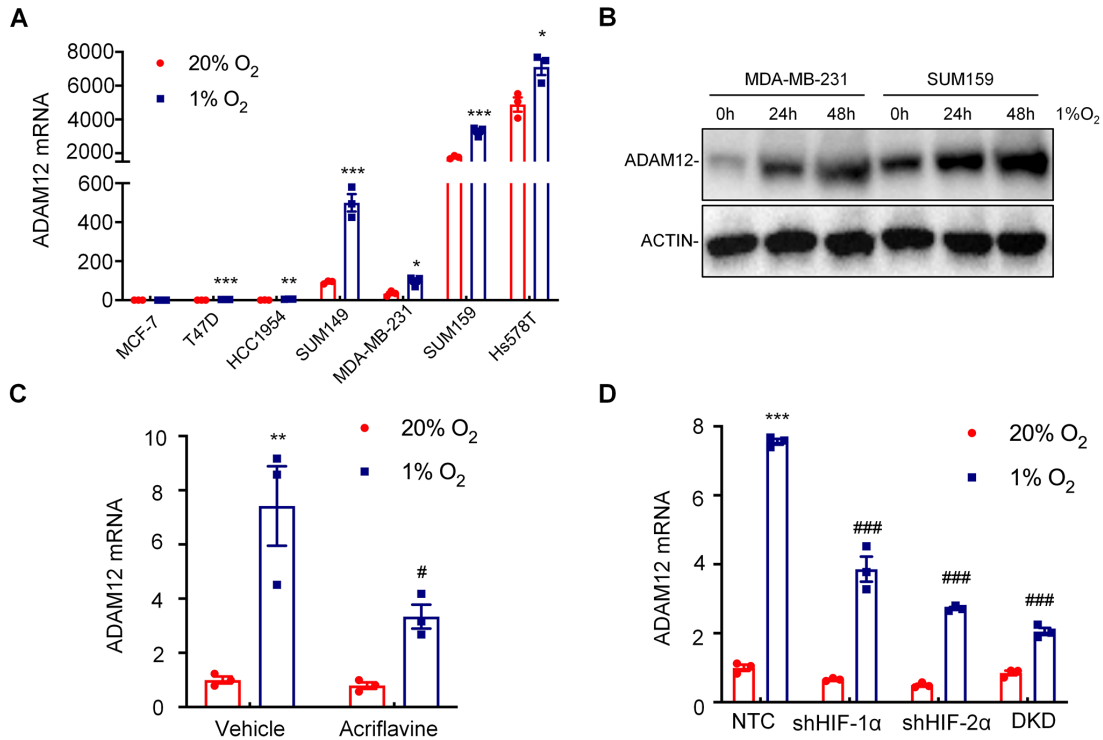

**Fig. S1.** ADAM12 expression in breast cancer is induced by hypoxia in a HIF-dependent manner. (A) RT-qPCR was performed to quantify ADAM12 mRNA levels in breast cancer cell lines following exposure to 20% or 1% O<sub>2</sub> for 24 h. For each cell line, the expression of ADAM12 mRNA was quantified relative to 18S rRNA and then normalized to the result obtained from HCC1954 cells at 20% O<sub>2</sub> (mean ± SEM; *n* = 3). \**P* < 0.05, \*\**P* < 0.01, \*\*\**P* < 0.001 versus 20% O<sub>2</sub> (Student's *t* test). (B) Immunoblot assays were performed to determine ADAM12 protein levels in breast cancer cell lines following exposure to 20% O<sub>2</sub> or to 1% O<sub>2</sub> for 24 or 48 h. (C) SUM149 cells were exposed to 20% or 1% O<sub>2</sub>, in the presence of vehicle or acriflavine (2.5 μM) for 24 h, and the expression of ADAM12 mRNA was assayed by RT-qPCR. \*\**P* < 0.01 versus vehicle at 20% O<sub>2</sub>; #*P* < 0.05 versus vehicle at 1% O<sub>2</sub> (two-way ANOVA with Tukey's post-test). (D) RT-qPCR was performed to quantify ADAM12 mRNA levels in SUM149 HIF-knockdown subclones exposed to 20% or 1% O<sub>2</sub> for 24 h. Data were normalized to NTC at 20% O<sub>2</sub> (mean ± SEM; *n* = 3). \*\*\**P* < 0.001 versus NTC at 20% O<sub>2</sub>; ###*P* < 0.001, versus NTC at 1% O<sub>2</sub> (two-way ANOVA with Tukey's post-test).

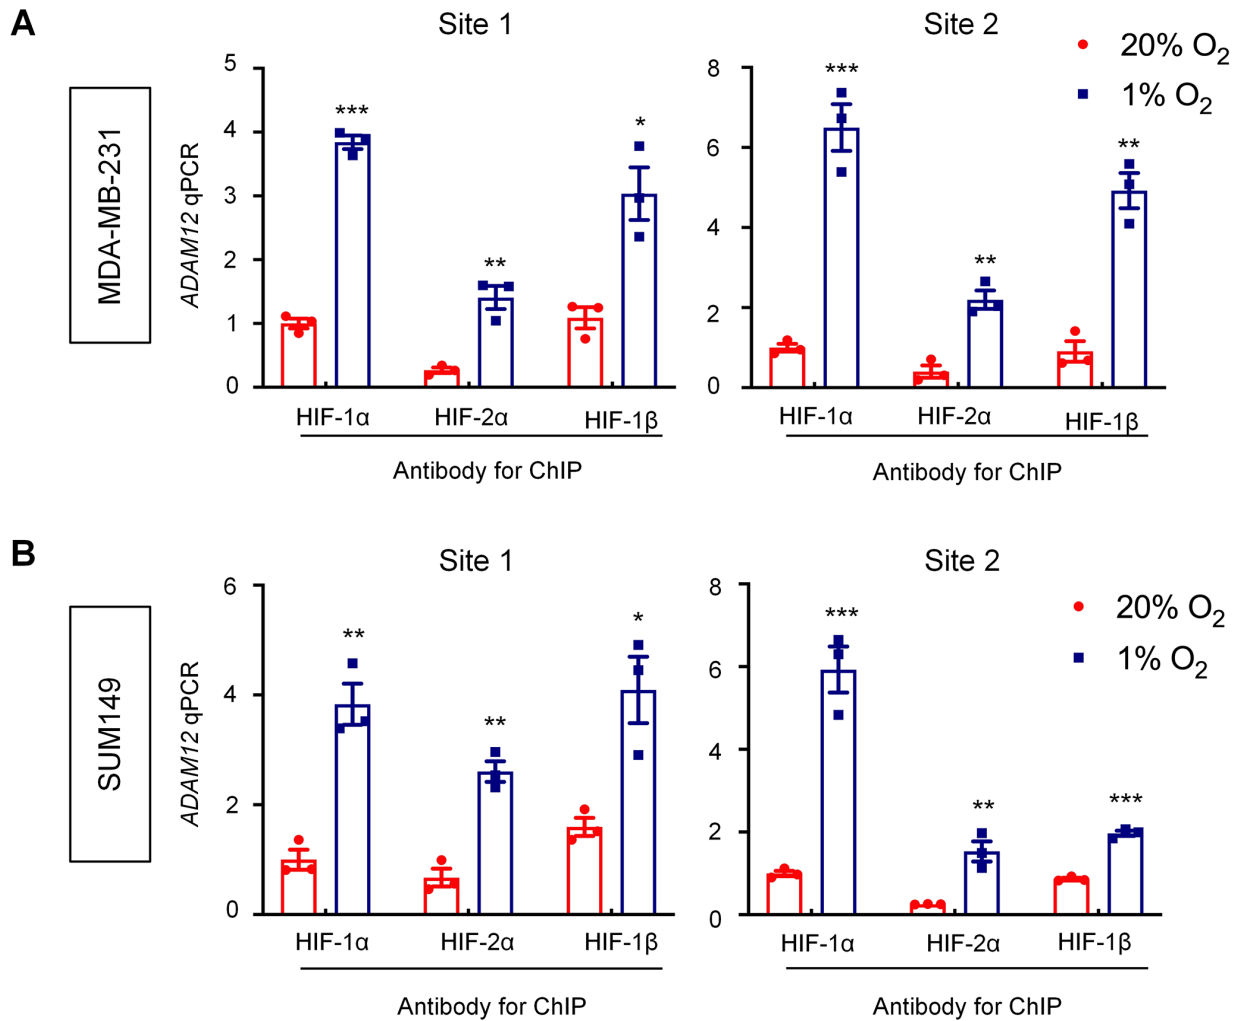

**Fig. S2.** *ADAM12* is a direct HIF target gene in human breast cancer cell lines. (A and B) MDA-MB-231 (A) and SUM149 (B) cells were incubated at 20% or 1% O<sub>2</sub> for 16 h, and ChIP was performed using antibodies against HIF-1α, HIF-2α, or HIF-1β. Primers flanking HIF binding sites were used for qPCR, and results were normalized to HIF-1α at 20% O<sub>2</sub> (mean ± SEM; *n* = 3). \**P* < 0.05, \*\**P* < 0.01, \*\*\**P* < 0.001 versus 20% O<sub>2</sub> (Student's *t* test).

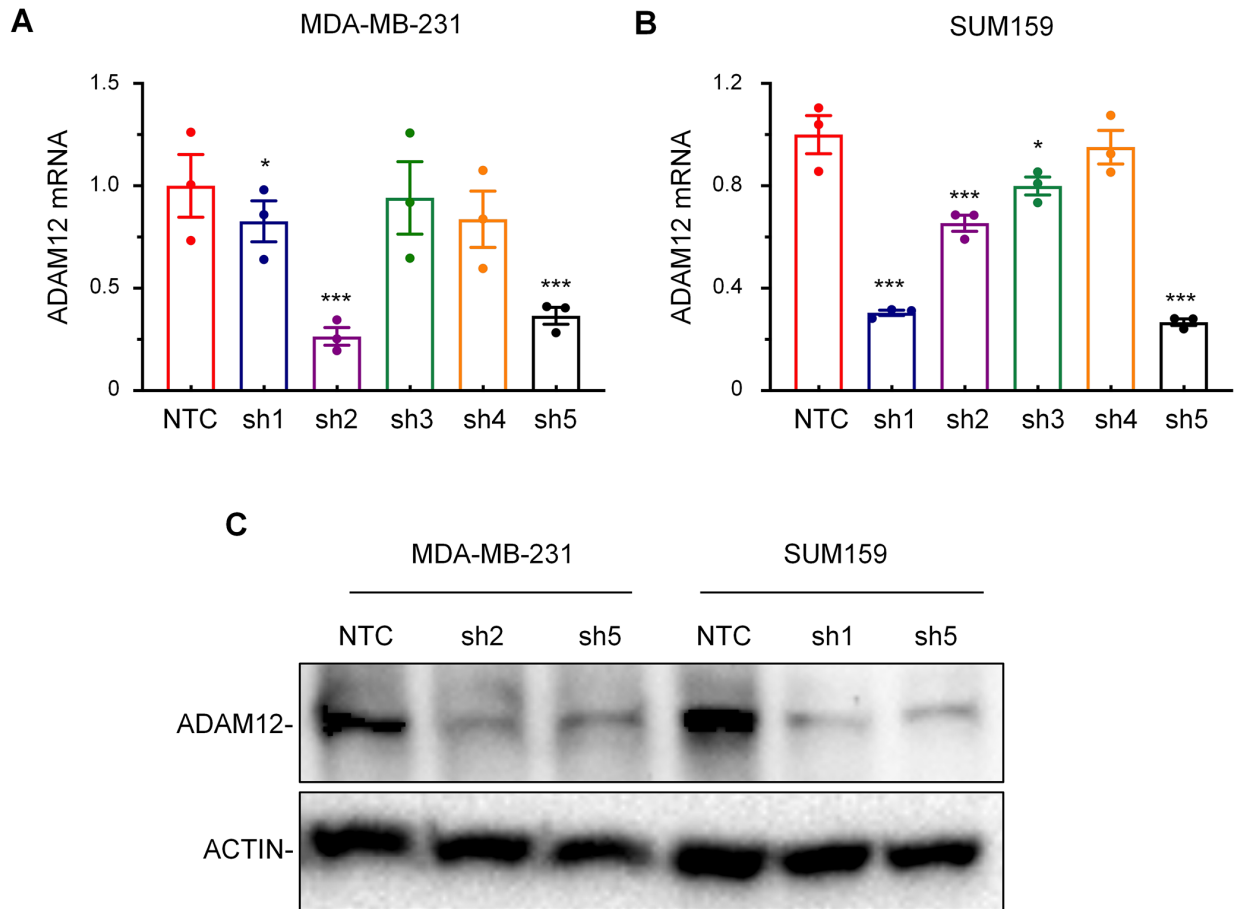

**Fig. S3.** Analysis of ADAM12 knockdown efficiency. (A and B) MDA-MB-231 (A) and SUM159 (B) cells were transduced with a non-targeting control (NTC) short hairpin RNA (shRNA) or one of five different shRNAs targeting ADAM12 (sh1, sh2, sh3, sh4, sh5), and RT-qPCR assays were performed to analyze ADAM12 mRNA expression (mean  $\pm$  SEM;  $n = 3$ ). \* $P < 0.05$ , \*\*\* $P < 0.001$  versus NTC (one-way ANOVA). (C) Immunoblot assays were performed to determine ADAM12 protein expression in ADAM12 knockdown subclones of MDA-MB-231 and SUM159 cells.

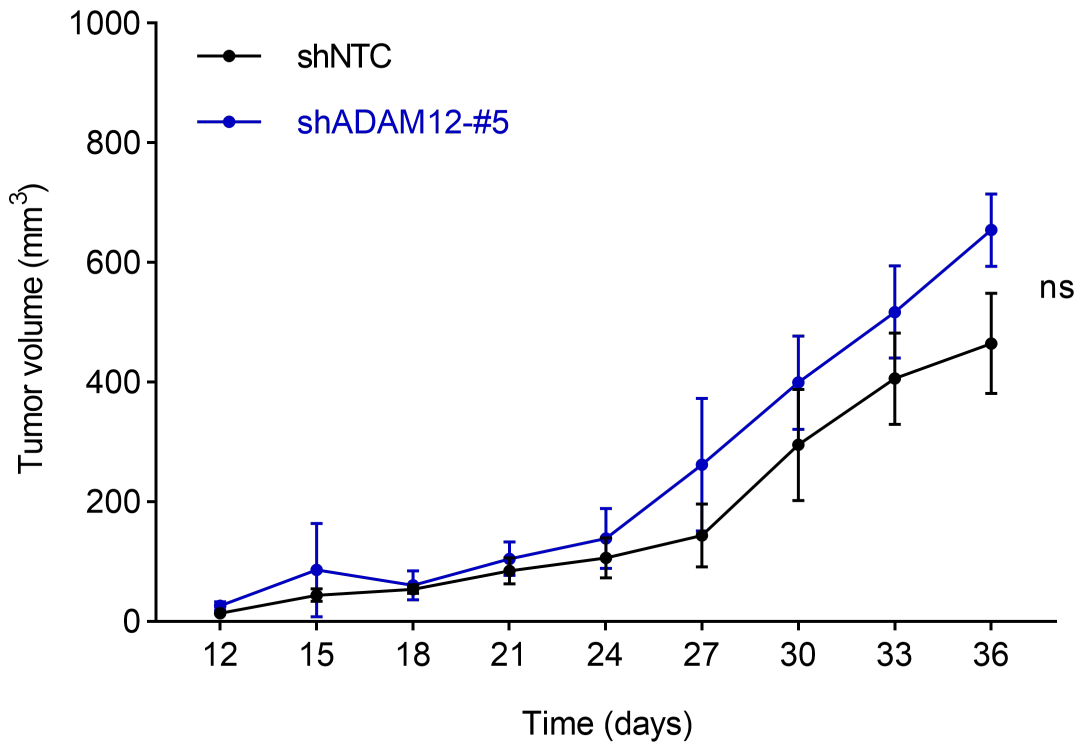

**Fig. S4.** Analysis of SUM159 tumor xenograft growth. SUM159 NTC and ADAM12 knockdown sh5 subclones ( $2 \times 10^6$  cells) were implanted into the mammary fat pad of 6-week-old female SCID mice. Primary tumor volume was determined every three days from day 12 to day 36 (mean + SEM,  $n = 5$  mice each; Kruskal-Wallis test with Benjamini-Hochberg post-test).

**Table S1.** Nucleotide sequences of primers used in RT-qPCR assays.

| RNA         | Primer  | Nucleotide sequence (5' to 3') |
|-------------|---------|--------------------------------|
| 18S rRNA    | Forward | CGGCGACGACCCATTCTGAAC          |
|             | Reverse | GAATCGAACCCCTGATTCCCCGTC       |
| ADAM12 mRNA | Forward | CGAGGGGTGAGCTTATGGAAC          |
|             | Reverse | GCTTCCCGTTGTAGTCGAATA          |

**Table S2.** Antibodies used for immunoblot (IB) and ChIP assays.

| Antibody              | Vendor                   | Catalog number |
|-----------------------|--------------------------|----------------|
| HIF-1 $\alpha$ (IB)   | BD Biosciences           | 610959         |
| HIF-1 $\alpha$ (ChIP) | Novus Biologicals        | NB100-479      |
| HIF-1 $\beta$         | Novus Biologicals        | NB100-110      |
| HIF-2 $\alpha$        | Novus Biologicals        | NB100-122      |
| ADAM12                | Abcam                    | ab223476       |
| HB-EGF                | Novus Biologicals        | AF259          |
| EGFR                  | Cell Signaling           | #4267          |
| p-EGFR (Y1173)        | Novus Biologicals        | AF1095         |
| FAK                   | Cell Signaling           | #3285          |
| p-FAK (Y397)          | Cell Signaling           | #8556          |
| $\beta$ -ACTIN        | Santa Cruz Biotechnology | SC-47778       |
| Rabbit IgG            | Novus Biologicals        | NBP2-36463     |

**Table S3.** Nucleotide sequences of primers used for ChIP-qPCR assays.

| ADAM12 gene site | Primer  | Nucleotide sequence (5' to 3') |
|------------------|---------|--------------------------------|
| Site 1           | Forward | CAACTCGGACAGTTTGCTCA           |
|                  | Reverse | CGCTGAGCTCTTCTAGCCTTT          |
| Site 2           | Forward | CAGCAGTTCAGGTCACAGGA           |
|                  | Reverse | ACAGGAATGCTGCAGGAAGT           |

**Table S4.** Wild-type (WT) and mutant (MUT) HRE1 and HRE2 oligonucleotides that were annealed and inserted into firefly luciferase reporter plasmid.

|               |           | <b>Nucleotide sequence (5' to 3')</b>                                     |
|---------------|-----------|---------------------------------------------------------------------------|
| pA12-HRE1-WT  | Sense     | GATCAAAGTTTCCCCCGTGTGTGTGCGTGC <u>CGT</u> GCGCGCGCG<br>CGCGCCGTTCTGGCACA  |
|               | Antisense | TCGATGTGCCAGAACGGCGCGCGCGCGCGC <u>CACG</u> CACGCACA<br>CACACGGGGGGAAACTTT |
| pA12-HRE1-MUT | Sense     | GATCAAAGTTTCCCCCGTGTGTGTGCGTGC <u>GAA</u> GCGCGCGCG<br>CGCGCCGTTCTGGCACA  |
|               | Antisense | TCGATGTGCCAGAACGGCGCGCGCGCGCGC <u>TTT</u> CACGCACAC<br>ACACGGGGGGAAACTTT  |
| pA12-HRE2-WT  | Sense     | GATCGGAGGCCGGGCACCTGGCCAGAATT <u>CACGC</u> CTCTGGCA<br>GTGGGCAGAGCTCAGGC  |
|               | Antisense | TCGAGCCTGAGCTCTGCCCACTGCCAGAG <u>GCGT</u> GAAATTCTGG<br>CCAGGTGCCCGGCCTCC |
| pA12-HRE2-MUT | Sense     | GATCGGAGGCCGGGCACCTGGCCAGAATT <u>CTTT</u> CCTCTGGCA<br>GTGGGCAGAGCTCAGGC  |
|               | Antisense | TCGAGCCTGAGCTCTGCCCACTGCCAGAG <u>GAA</u> GAATTCTGG<br>CCAGGTGCCCGGCCTCC   |

**Table S5.** Clone ID number for ADAM12 shRNAs.

| <b>Gene</b> | <b>Catalog number</b> |
|-------------|-----------------------|
| ADAM12-sh1  | TRCN0000047033        |
| ADAM12-sh2  | TRCN0000047034        |
| ADAM12-sh3  | TRCN0000047035        |
| ADAM12-sh4  | TRCN0000047036        |
| ADAM12-sh5  | TRCN0000047037        |
